# Supplementary material for: Prognostic Significance of KIT Mutations in Core-Binding Factor Acute Myeloid Leukemia: A Systematic Review and Meta-Analysis
Source: PubMed Central journal article supplement (PMC4714806; doi:10.1371/journal.pone.0146614), 2016-01-15

Filled funnel plot with pseudo 95% confidence limits

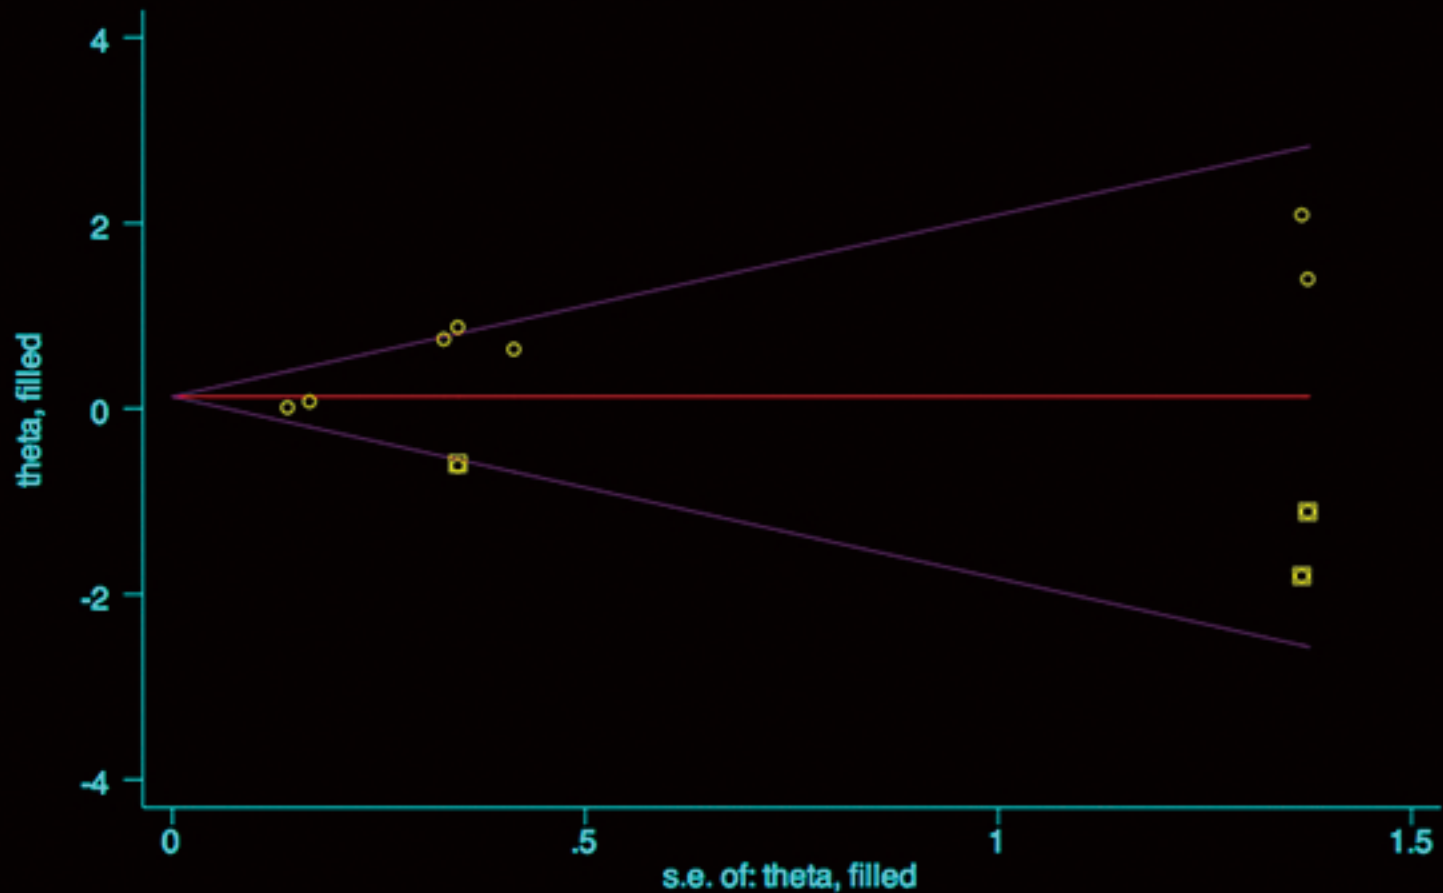

Supplement: pone.0146614.s001.pdf [file pone.0146614.s001.pdf]
