# Supplementary material for: Prognostic Significance of KIT Mutations in Core-Binding Factor Acute Myeloid Leukemia: A Systematic Review and Meta-Analysis
Source: PubMed Central journal article supplement (PMC4714806; doi:10.1371/journal.pone.0146614), 2016-01-15
Supplement: pone.0146614.s003.pdf [file pone.0146614.s003.pdf]

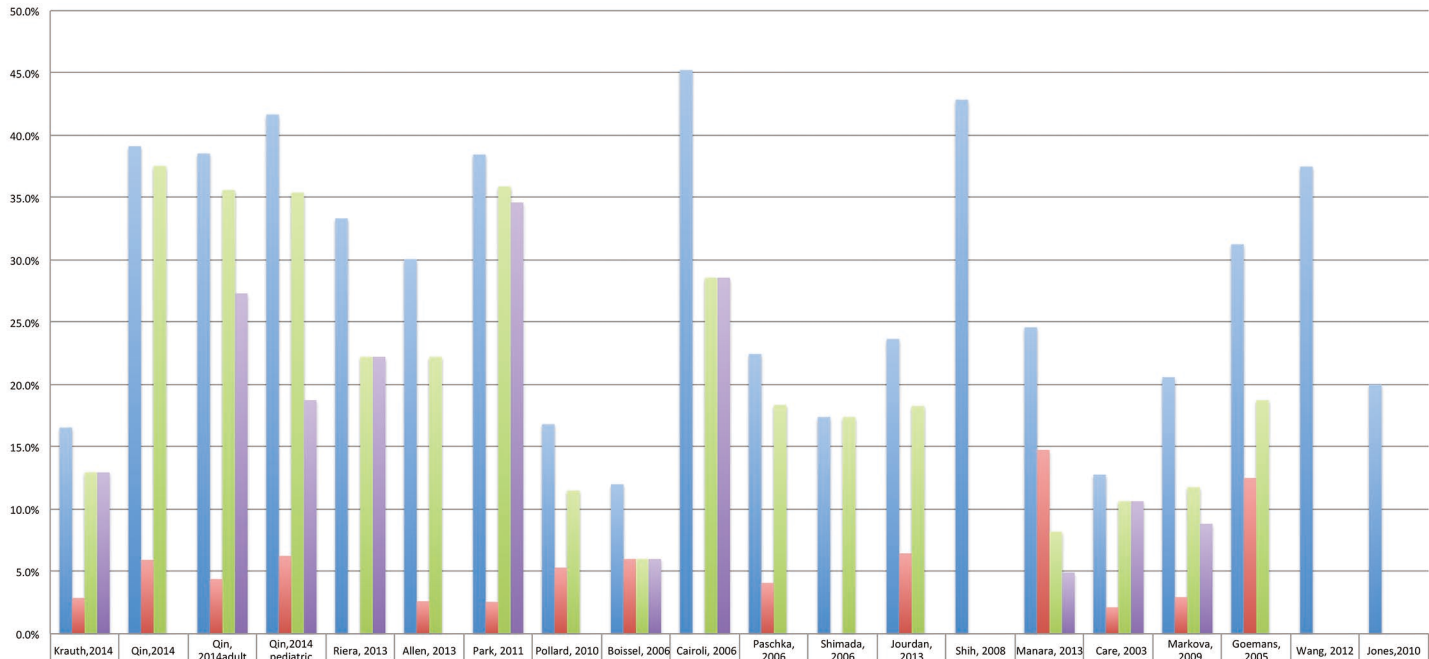

|             |       |       |       |       |       |       |       |       |       |       |       |       |       |       |       |       |       |       |       |       |
|-------------|-------|-------|-------|-------|-------|-------|-------|-------|-------|-------|-------|-------|-------|-------|-------|-------|-------|-------|-------|-------|
| mut/total%  | 16.5% | 39.1% | 38.5% | 41.7% | 33.3% | 30.1% | 38.5% | 16.8% | 12.0% | 45.2% | 22.4% | 17.4% | 23.7% | 42.9% | 24.6% | 12.8% | 20.6% | 31.3% | 37.5% | 20.0% |
| exon8/mut%  | 2.9%  | 5.9%  | 4.4%  | 6.3%  | 0.0%  | 2.6%  | 2.6%  | 5.3%  | 6.0%  | 0.0%  | 4.1%  | 0.0%  | 6.5%  | 0.0%  | 14.8% | 2.1%  | 2.9%  | 12.5% | 0.0%  | 0.0%  |
| exon17/mut% | 12.9% | 37.5% | 35.6% | 35.4% | 22.2% | 22.2% | 35.9% | 11.5% | 6.0%  | 28.6% | 18.4% | 17.4% | 18.3% | 0.0%  | 8.2%  | 10.6% | 11.8% | 18.8% | 0.0%  | 0.0%  |
| D816/mut%   | 12.9% | 0.0%  | 27.3% | 18.8% | 22.2% | 0.0%  | 34.6% | 0.0%  | 6.0%  | 28.6% | 0.0%  | 0.0%  | 0.0%  | 0.0%  | 4.9%  | 10.6% | 8.8%  | 0.0%  | 0.0%  | 0.0%  |
