# Supplementary material for: Prognostic Significance of KIT Mutations in Core-Binding Factor Acute Myeloid Leukemia: A Systematic Review and Meta-Analysis
Source: PubMed Central journal article supplement (PMC4714806; doi:10.1371/journal.pone.0146614), 2016-01-15
Supplement: pone.0146614.s005.pdf [file pone.0146614.s005.pdf]

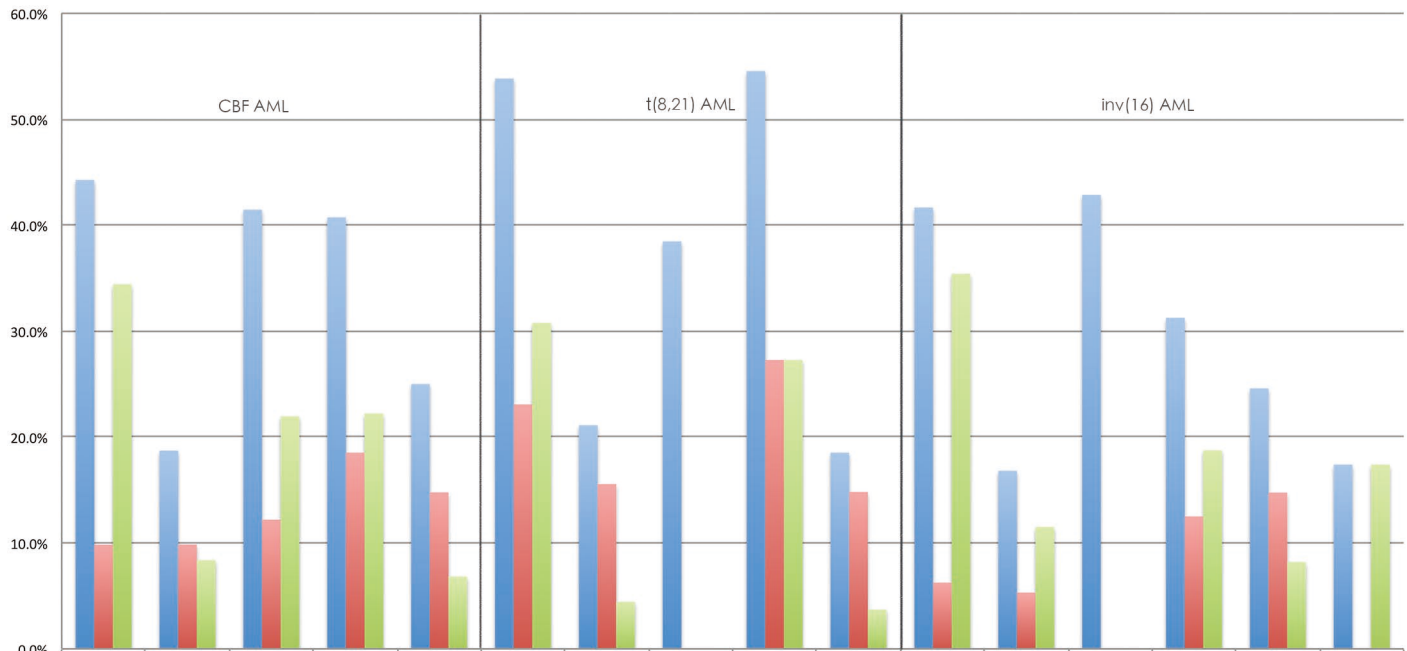

|             | Qin,2014 pediatric | Pollard, 2010 | Shih, 2008 | Goemans, 2005 | Manara, 2013 | Qin,2014 pediatric | Pollard, 2010 | Shih, 2008 | Goemans, 2005 | Manara, 2013 | Qin,2014 pediatric | Pollard, 2010 | Shih, 2008 | Goemans, 2005 | Manara, 2013a | Shimada, 2006d |
|-------------|--------------------|---------------|------------|---------------|--------------|--------------------|---------------|------------|---------------|--------------|--------------------|---------------|------------|---------------|---------------|----------------|
| mut/total%  | 44.3%              | 18.7%         | 41.5%      | 40.7%         | 25.0%        | 53.8%              | 21.1%         | 38.5%      | 54.5%         | 18.5%        | 41.7%              | 16.8%         | 42.9%      | 31.3%         | 24.6%         | 17.4%          |
| exon8/mut%  | 9.8%               | 9.9%          | 12.2%      | 18.5%         | 14.8%        | 23.1%              | 15.6%         | 0.0%       | 27.3%         | 14.8%        | 6.3%               | 5.3%          | 0.0%       | 12.5%         | 14.8%         | 0.0%           |
| exon17/mut% | 34.4%              | 8.4%          | 22.0%      | 22.2%         | 6.8%         | 30.8%              | 4.4%          | 0.0%       | 27.3%         | 3.7%         | 35.4%              | 11.5%         | 0.0%       | 18.8%         | 8.2%          | 17.4%          |
