# Supplementary material for: Prognostic Significance of KIT Mutations in Core-Binding Factor Acute Myeloid Leukemia: A Systematic Review and Meta-Analysis
Source: PubMed Central journal article supplement (PMC4714806; doi:10.1371/journal.pone.0146614), 2016-01-15
Supplement: pone.0146614.s009.pdf [file pone.0146614.s009.pdf]

| Outcome      | AML     | Studies Included,<br>n | Participants,<br>n | Fixed <sup>§</sup> |                   | Random <sup>§</sup> |       | Heterogeneity |                | Subgroup Differences |                |                     |                |
|--------------|---------|------------------------|--------------------|--------------------|-------------------|---------------------|-------|---------------|----------------|----------------------|----------------|---------------------|----------------|
|              |         |                        |                    | RRs                | 95%CI#            | RRs                 | 95%CI | P             | I <sup>2</sup> | Fixed <sup>§</sup>   |                | Random <sup>§</sup> |                |
|              |         |                        |                    |                    |                   |                     |       |               |                | P                    | I <sup>2</sup> | P                   | I <sup>2</sup> |
| CR           |         |                        |                    |                    |                   |                     |       |               |                |                      |                |                     |                |
|              | CBF AML | 9                      | 1131               | 1.24 [0.81, 1.90]  | 1.25 [0.75, 2.11] | 0.3                 | 16%   |               |                |                      |                |                     |                |
|              | t(8,21) | 7                      | 567                | 1.62 [0.90, 2.92]  | 1.68 [0.90, 3.15] | 0.55                | 0%    | 0.19          | 42.0%          | 0.27                 | 19.0%          |                     |                |
|              | inv(16) | 8                      | 564                | 0.91 [0.49, 1.70]  | 0.99 [0.50, 1.96] | 0.39                | 4%    |               |                |                      |                |                     |                |
|              | Total   | 9                      | 1131               | 1.23 [0.80, 1.88]  | 1.30 [0.83, 2.06] | 0.49                | 0%    |               |                |                      |                |                     |                |
| OS           |         |                        |                    |                    |                   |                     |       |               |                |                      |                |                     |                |
|              | CBF AML | 4                      | 610                | 1.15 [0.99, 1.33]  | 1.15 [0.99, 1.33] | 0.99                | 0%    |               |                |                      |                |                     |                |
|              | t(8,21) | 5                      | 385                | 1.45 [1.12, 1.87]  | 1.79 [0.92, 3.49] | 0.02                | 65%   | 0.03          | 79.0%          | 0.11                 | 60.0%          |                     |                |
|              | inv(16) | 7                      | 547                | 1.04 [0.90, 1.21]  | 1.03 [0.85, 1.24] | 0.18                | 33%   |               |                |                      |                |                     |                |
|              | Total   | 7                      | 932                | 1.16 [1.02, 1.32]  | 1.13 [0.93, 1.38] | 0.03                | 48%   |               |                |                      |                |                     |                |
| Relapse Risk |         |                        |                    |                    |                   |                     |       |               |                |                      |                |                     |                |
| 2y           | CBF AML | 7                      | 767                | 1.56 [1.34, 1.82]  | 1.56 [1.34, 1.82] | 0.81                | 0%    |               |                |                      |                |                     |                |
|              | t(8,21) | 6                      | 467                | 1.75 [1.43, 2.13]  | 1.75 [1.44, 2.12] | 0.87                | 0%    | 0.02          | 81.0%          | 0.25                 | 25.0%          |                     |                |
|              | inv(16) | 5                      | 300                | 1.21 [0.95, 1.54]  | 1.32 [0.85, 2.04] | 0.11                | 48%   |               |                |                      |                |                     |                |
|              | Total   | 7                      | 767                | 1.50 [1.29, 1.75]  | 1.59 [1.33, 1.91] | 0.25                | 20%   |               |                |                      |                |                     |                |
| 5y           | CBF AML | 6                      | 781                | 1.51 [1.26, 1.81]  | 1.52 [1.27, 1.82] | 0.73                | 0%    |               |                |                      |                |                     |                |
|              | t(8,21) | 5                      | 418                | 1.79 [1.36, 2.36]  | 1.82 [1.39, 2.39] | 0.79                | 0%    | 0.04          | 77.0%          | 0.22                 | 35.0%          |                     |                |
|              | inv(16) | 6                      | 387                | 1.21 [0.95, 1.54]  | 1.32 [0.85, 2.04] | 0.11                | 48%   |               |                |                      |                |                     |                |
|              | Total   | 6                      | 805                | 1.44 [1.20, 1.72]  | 1.56 [1.23, 1.99] | 0.17                | 32%   |               |                |                      |                |                     |                |

<sup>§</sup> Abbreviations for fixed-effects model and random-effects model.

<sup>#</sup> ORs for CR and RRs for OS and relapse rate.
