# Supplementary material for: Prognostic Significance of KIT Mutations in Core-Binding Factor Acute Myeloid Leukemia: A Systematic Review and Meta-Analysis
Source: PLOS journal article supplement (doi:10.1371/journal.pone.0146614), 2016-01-15

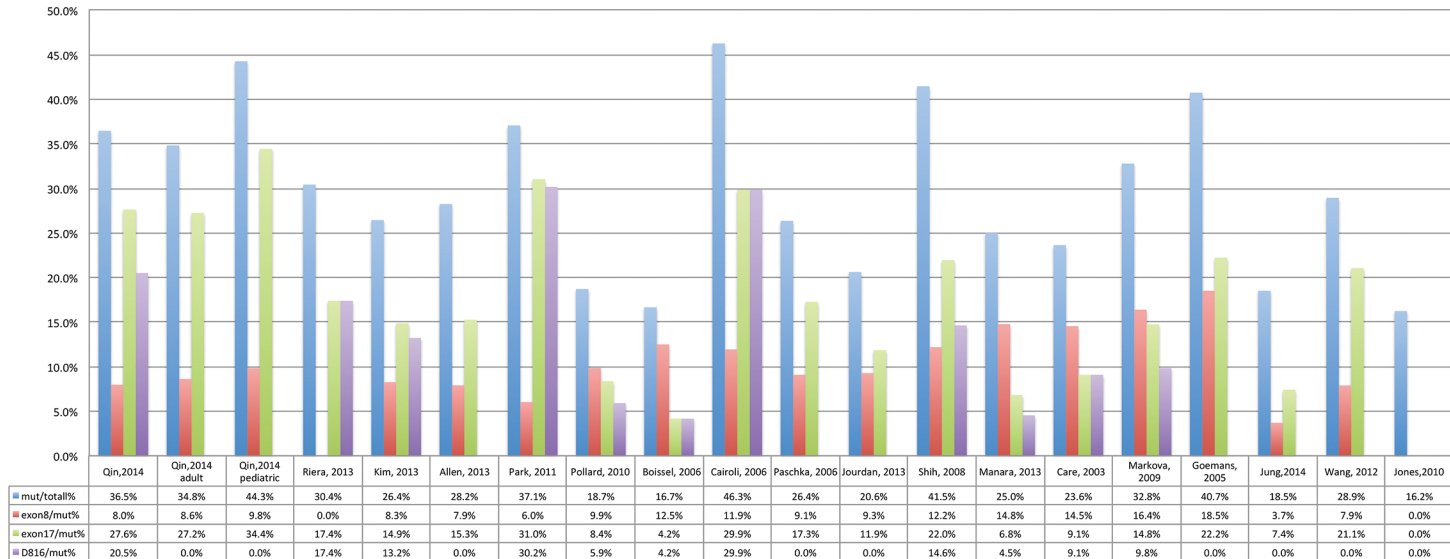

Supplement: S2 (10.1371/journal.pone.0146614.s002) [file journal.pone.0146614.s002]
