# Supplementary material for: Prognostic Significance of KIT Mutations in Core-Binding Factor Acute Myeloid Leukemia: A Systematic Review and Meta-Analysis
Source: PLOS journal article supplement (doi:10.1371/journal.pone.0146614), 2016-01-15
Supplement: S6 (10.1371/journal.pone.0146614.s006) [file journal.pone.0146614.s006]

| Reference     | Induction Treatment                                                                                            | Post-Remission Chemotherapy                                                                                                                                                                    | Detection Method              |
|---------------|----------------------------------------------------------------------------------------------------------------|------------------------------------------------------------------------------------------------------------------------------------------------------------------------------------------------|-------------------------------|
| Allen, 2013   | UK MRC AML10, AML12 or AML15 trials                                                                            | Details of the trial protocols have been published elsewhere.                                                                                                                                  | PCR, Direct sequencing        |
| Cairolì, 2006 | DA"3+7" or ICE                                                                                                 | 3 consolidation courses include cytarabine                                                                                                                                                     | PCR, Direct sequencing        |
| Boissel, 2006 | According to previous or current adult ALFA (ALFA90, ALFA98) or pediatric LAME (LAME91, LAME99, ELAM02) trials | High-dose cytarabine. Owing to the low rate of mutations reported in our study, we did not evaluate the place of allogeneic SCT performed in only 10% of patients (10/97 in first CR).         | PCR, Direct sequencing        |
| Paschka, 2006 | DA"3+7" or ICE                                                                                                 | 3 or 4 consolidation courses include cytarabine                                                                                                                                                | PCR, Direct sequencing        |
| Pollard, 2010 | Details of treatment protocols POG-9421, CCG-2891, and CCG-2961. COG AAML03P1                                  | Details of treatment protocols POG-9421, CCG-2891, and CCG-2961                                                                                                                                | PCR, Direct sequencing        |
| Shimada, 2006 | ICE                                                                                                            | 5 additional courses of intensive chemotherapy (high-dose cytarabine [HDCA], etoposide, idarubicine, and mitoxantron).                                                                         | PCR, Direct sequencing        |
| Paschka, 2013 | Intensive anthracycline /cytarabine-based induction therapy                                                    | Intensive post remission therapy.                                                                                                                                                              | PCR, Direct sequencing        |
| Park, 2011    | DA'7 + 3'                                                                                                      | Intermediate-dose cytarabine-based chemotherapy, chemotherapy with autologous- hematopoietic stem cell transplantation (HSCT), and chemotherapy with allogeneic (allo)-HSCT for consolidation. | PCR, Direct sequencing        |
| Riera, 2013   | ICE                                                                                                            | Consolidation treatment with high-doses cytarabine.                                                                                                                                            | PCR, Direct sequencing        |
| Qin, 2014     | ICE or DA'3 + 7'                                                                                               | Consolidation treatment with high-doses cytarabine for adult, chemotherapy with allogeneic (allo)-HSCT for children.                                                                           | PCR, bidirectional sequencing |
| Cairolì, 2013 | DA'3 + 7'                                                                                                      | Three doses of anthracycline or the "ICE" schedule.                                                                                                                                            | PCR, Direct sequencing        |

PCR: Quantitative Real-time, BHAC: behenoylcytosine arabinoside, DBHAC'3 + 7': regimen with three doses of anthracycline and behenoylcytosine arabinoside in 7 day continuous intravenous infusion, DA'3 + 7': regimen with three doses of anthracycline and cytarabine in 7 day continuous intravenous infusion, ICE: schedule including etoposide 100 mg/m<sup>2</sup>/day on days 1 – 5, TAD: 6-thioguanine, cytarabine and daunorubicin, HAM: high- dose cytarabine and mitoxantrone, HSCT: hematopoietic stem cell transplantation, SCT: stem cell transplantation
